# Supplementary material
Source: PubMed Central journal article supplement (PMC4598996)
Supplement: supp_M115.665752_jbc.M115.665752-2.pdf [file supp_M115.665752_jbc.M115.665752-2.pdf]

**Miller et al supplement.**

Supplemental Table 1. In vitro metabolomics data. The first three Excel spreadsheets contain raw, scaled, and normalized data for all metabolites analyzed in irradiated WT and CD47(-) Jurkat cells. The fourth spreadsheet contains the pathway heat map and complete statistical analysis analyzing effects of genotype, radiation, and time on each named metabolite. Dark red cells indicate increased levels with  $p < 0.05$ , light red indicates increased levels with  $0.05 < p < 0.1$ . Dark green cells indicate decreased levels with  $p < 0.05$ , light green indicates decreased levels with  $0.05 < p < 0.1$ . Blue cells indicate ANOVA effects with  $p < 0.05$ .
